# Supplementary material
Source: publisher figshare collection journal article supplement (https://tandf.figshare.com/articles/dataset/_/5089945)
Supplement: Supplementary file 1 [file 1]

**Survey Azimuths Resecting Station 21 and Te Puai Island Station**

23-04-17

| <b><u>Azimuth</u></b> |                                                           | <b><u>Azimuths from Station 21</u></b> | <b><u>Azimuth</u></b> | <b>IGRF</b>               | <b>Rev. Admiralty</b>                 | <b>23-04-17</b>          |                          |
|-----------------------|-----------------------------------------------------------|----------------------------------------|-----------------------|---------------------------|---------------------------------------|--------------------------|--------------------------|
|                       |                                                           |                                        |                       | <b><u>Declination</u></b> | <b><u>Declination<sup>3</sup></u></b> | <b>First</b>             | <b>Second</b>            |
|                       |                                                           |                                        |                       |                           |                                       | <b><u>Reciprocal</u></b> | <b><u>Reciprocal</u></b> |
| 1                     | Mr Spencers (Te Wairoa) Trig 505                          | 306.500                                | 14.040                | 11.980                    | 498.480                               | <b>138.480</b>           |                          |
|                       | <u>Te Kumete Ridge</u>                                    |                                        |                       |                           |                                       |                          |                          |
| 2                     | Peak on the Track (escarpment)                            | 314.667                                | 14.040                | 11.980                    | 506.647                               | 146.647                  |                          |
| 3                     | Second Left Peak (left end of Trig 3058 plateau)          | 322.667                                | 14.040                | 11.980                    | 514.647                               | 154.647                  |                          |
| 4                     | Te Kumete-Highest Point (Trig 3058 and ALQC) <sup>1</sup> | 326.000                                | 14.040                | 11.980                    | 517.980                               | <b>157.980</b>           |                          |
| 5                     | Next Right Point (left end of 515 Trig plateau)           | 334.333                                | 14.040                | 11.980                    | 526.313                               | 166.313                  |                          |
| 6                     | Point on Tarawera (Mataneho Point)                        | 355.000                                | 14.040                | 11.980                    | 546.980                               | 186.980                  |                          |
| 7                     | Makatiti highest point (Western peak)                     | 359.333                                | 14.040                | 11.980                    | 551.313                               | 191.313                  |                          |
|                       | <u>Tarawera Berg</u>                                      |                                        |                       |                           |                                       |                          |                          |
| 8                     | NW Corner of Plateau near Trig 949                        | 43.500                                 | 14.040                | 11.980                    | 235.480                               | n/a                      |                          |
| 9                     | Highest Point (Smith Station) <sup>2</sup>                | 46.167                                 | 14.040                | 11.980                    | <b>238.147</b>                        | n/a                      |                          |
| 10                    | SE Corner of Plateau (adjacent Trig 1024)                 | 53.000                                 | 14.040                | 11.980                    | 244.980                               | n/a                      |                          |
|                       | <b><u>Azimuths from Te Puai Island Station</u></b>        |                                        |                       |                           |                                       |                          |                          |
| 11                    | Second Peak (escarpment left of Trig 3058)                | 298.167                                | 14.040                | 11.980                    | 490.147                               | <b>130.147</b>           |                          |
| 12                    | Te Kumete peak (Trig 3058 and ALQC) <sup>1</sup>          | 313.000                                | 14.040                | 11.980                    | 504.980                               | <b>144.980</b>           |                          |
| 13                    | Tarawera Mtn highest peak (Smith station) <sup>2</sup>    | 48.833                                 | 14.040                | 11.980                    | <b>240.813</b>                        | n/a                      |                          |

<sup>1</sup> Note the two Te Kumete survey stations (Te Kumete and station 7691) are similarly aligned on our bearing

<sup>2</sup> Smith Report- *Eruption of Tarawera*, 1887, p.46

<sup>3</sup> Final iteration following IGRF and 1858 Admiralty declination data refined by Lehmann's method.

NB: azimuths 1, 4 and 9 resected Station 21 while azimuths 11,12 and 13 resected Te Puai Station
